# Supplementary material for: MicroRNA Variants and HLA-miRNA Interactions are Novel Rheumatoid Arthritis Susceptibility Factors
Source: Front Genet. 2021 Oct 29;12:747274. doi: 10.3389/fgene.2021.747274 (PMC8585984; doi:10.3389/fgene.2021.747274)
Supplement: Supplementary file 1 [file Table2.XLSX]

## Sheet: Table S3
CHR	SNP	A1	A2	AFF	UNAFF	P
6	rs9268839	A	G	1364/1850	1768/1392	1.439e-27
6	rs9275376	T	G	804/2410	496/2664	1.804e-20
6	rs9275375	A	G	1064/2150	788/2372	1.869e-12
6	rs7752903	G	T	205/3009	136/3024	0.0002118
6	rs4947332	T	C	72/3142	34/3126	0.0003235
1	rs1414273	C	T	1303/1911	1412/1748	0.000911
15	rs2620381	C	A	254/2960	318/2842	0.002716
14	rs75330474	T	C	121/3093	159/3001	0.01286
18	rs370878033	G	A	54/3160	81/3079	0.01553
7	rs3823658	A	G	432/2782	363/2797	0.017
1	rs74085143	A	G	130/3084	166/2994	0.02149
6	rs7740161	T	A	459/2755	515/2645	0.02487
3	rs4687672	A	G	1082/2132	983/2177	0.0292
22	rs5997893	A	G	1509/1705	1565/1595	0.03957
19	rs2967897	T	C	541/2673	473/2687	0.03959
15	rs76468441	T	C	104/3110	76/3084	0.04463
1	rs12402181	A	G	1157/2057	1064/2096	0.05407
19	rs4112253	C	G	78/3136	102/3058	0.05698
14	rs28477407	T	C	1290/1924	1341/1819	0.06512
11	rs7350542	G	A	640/2574	574/2586	0.07059
11	rs11237828	C	T	1139/2075	1052/2108	0.07137
19	rs72996752	G	A	890/2324	814/2346	0.08222
3	rs6771809	C	T	431/2783	378/2782	0.08625
3	rs6787734	C	T	1110/2104	1156/2004	0.08912
16	rs35613341	C	G	1426/1788	1336/1824	0.09094
10	rs45596840	A	G	536/2678	577/2583	0.09535
19	rs10406069	A	G	645/2569	687/2473	0.09964
7	rs117344178	T	C	78/3136	98/3062	0.1035
16	rs56292801	G	A	1427/1787	1341/1819	0.1119
15	rs2060455	A	G	906/2308	836/2324	0.1167
8	rs12549434	C	T	55/3159	71/3089	0.1238
6	rs4285314	G	A	470/2744	506/2654	0.1287
11	rs12803915	A	G	458/2756	493/2667	0.1311
17	rs58390814	T	C	138/3076	112/3048	0.1312
12	rs3751304	C	T	617/2597	654/2506	0.1328
2	rs6717413	G	A	407/2807	362/2798	0.1334
5	rs77966622	A	G	90/3124	70/3090	0.1354
3	rs78790512	A	G	53/3161	68/3092	0.1408
3	rs75715827	C	T	61/3153	77/3083	0.141
11	rs174561	C	T	1317/1897	1238/1922	0.1426
12	rs10878362	A	C	272/2942	236/2924	0.1459
2	rs74322818	T	C	73/3141	90/3070	0.147
4	rs28664200	C	T	1595/1619	1512/1648	0.1484
19	rs57111412	G	A	978/2236	910/2250	0.1491
1	rs1953090	G	T	592/2622	538/2622	0.1515
14	rs2273626	C	A	592/2622	700/2460	0.1618
19	rs1003723	T	C	471/2743	503/2657	0.167
13	rs1572687	T	C	923/2291	956/2204	0.1677
13	rs67976778	T	C	1386/1828	1415/1745	0.1801
6	rs67182313	A	G	801/2413	743/2417	0.1864
3	rs2292181	C	G	111/3103	129/3031	0.194
1	rs877722	T	A	641/2573	591/2569	0.2034
11	rs174583	T	C	1340/1874	1268/1892	0.204
1	rs73108496	G	A	329/2885	354/2806	0.2173
9	rs3780662	T	C	270/2944	293/2867	0.2195
14	rs145135208	G	A	268/2946	291/2869	0.2225
14	rs12894467	C	T	787/2427	733/2427	0.2226
6	rs17881225	C	G	915/2299	733/2427	0.2422
11	rs515924	G	A	1097/2117	1122/2038	0.2438
5	rs367805	T	C	1337/1877	1270/1890	0.2494
10	rs641071	T	G	858/2356	884/2276	0.2501
1	rs2275874	T	C	1139/2075	1163/1997	0.2554
16	rs58353328	G	A	333/2881	301/2859	0.2629
17	rs8078913	C	T	1056/2158	1080/2080	0.2687
21	rs451887	T	C	414/2800	436/2724	0.2782
5	rs11745587	A	G	817/2397	840/2320	0.2885
5	rs702742	G	A	278/2936	297/2863	0.293
19	rs8667	A	G	1467/1747	1402/1758	0.2966
7	rs361399	A	G	598/2616	557/2603	0.3072
7	rs361398	A	G	598/2616	557/2603	0.3072
7	rs361397	A	G	598/2616	557/2603	0.3072
12	rs11176006	A	G	319/2895	290/2870	0.3105
7	rs62442513	T	C	261/2953	235/2925	0.312
2	rs10175383	C	G	806/2408	759/2401	0.3215
12	rs1683709	G	A	1559/1655	1494/1666	0.3327
17	rs7208391	G	C	1500/1714	1437/1723	0.3419
19	rs975947	T	C	1204/2010	1148/2012	0.3504
10	rs7070684	A	G	1227/1987	1171/1989	0.3561
7	rs11983381	G	A	284/2930	300/2860	0.3678
2	rs62182086	G	A	129/3085	141/3019	0.3692
16	rs16958290	C	G	1011/2203	1027/2133	0.3699
12	rs1290910	C	G	1571/1643	1580/1580	0.37
12	rs2289030	C	G	690/2524	707/2453	0.3804
12	rs61938575	A	G	700/2514	717/2443	0.3842
12	rs832733	T	C	650/2564	667/2493	0.3913
4	rs34115976	G	C	187/3027	200/2960	0.3961
12	rs2682818	A	C	874/2340	831/2329	0.4153
19	rs1688017	A	G	766/2448	726/2434	0.4156
5	rs3734050	T	C	106/3108	116/3044	0.4173
11	rs11032942	C	T	249/2965	262/2898	0.4206
6	rs2276448	C	T	923/2291	879/2281	0.4267
20	rs744591	C	A	1562/1652	1504/1656	0.4271
14	rs61992671	G	A	91/3123	100/3060	0.4307
2	rs2241347	C	T	730/2484	744/2416	0.4324
2	rs2292879	G	A	1016/2198	1028/2132	0.4332
3	rs78831152	T	C	333/2881	309/2851	0.4396
2	rs58450758	T	C	559/2655	573/2587	0.4411
16	rs2925980	G	A	1369/1845	1316/1844	0.4424
1	rs79639536	G	A	134/3080	144/3016	0.4485
1	rs619608	A	G	538/2676	551/2609	0.4539
10	rs7911488	G	A	1085/2129	1039/2121	0.4581
10	rs2368393	G	A	1049/2165	1005/2155	0.4753
10	rs2368392	A	G	1049/2165	1005/2155	0.4753
2	rs79402775	A	G	440/2774	452/2708	0.4827
5	rs266435	C	G	521/2693	492/2668	0.4875
7	rs6464546	A	G	476/2738	449/2711	0.4993
1	rs76756293	T	C	314/2900	324/2836	0.5159
1	rs17111728	C	T	316/2898	326/2834	0.5166
3	rs142342924	A	G	750/2464	716/2444	0.5212
14	rs58834075	T	C	81/3133	72/3088	0.5232
5	rs62376934	A	G	325/2889	335/2825	0.529
4	rs73239138	A	G	1259/1955	1262/1898	0.5292
2	rs77373668	C	G	242/2972	251/2909	0.5339
5	rs936581	A	G	54/3160	47/3113	0.5344
8	rs66683138	A	G	1293/1921	1247/1913	0.5371
3	rs10934682	G	T	536/2678	545/2615	0.5401
19	rs56061231	G	A	1474/1740	1425/1735	0.5439
10	rs12416605	T	C	105/3109	95/3065	0.5462
3	rs9842591	A	C	1606/1608	1555/1605	0.5468
6	rs77651740	T	G	1157/2057	1115/2045	0.5472
14	rs2296319	A	G	419/2795	428/2732	0.5531
1	rs701213	C	T	1029/2185	1032/2128	0.5842
9	rs56195815	T	C	345/2869	326/2834	0.5897
19	rs7247767	G	A	1289/1925	1288/1872	0.5928
2	rs56148568	C	T	670/2544	642/2518	0.5995
7	rs60871950	A	G	761/2453	731/2429	0.6026
19	rs75598818	A	G	334/2880	341/2819	0.6042
8	rs78360334	C	T	278/2936	262/2898	0.6052
8	rs56863230	C	G	221/2993	207/2953	0.606
19	rs7247237	T	C	1289/1925	1287/1873	0.6106
8	rs10505168	C	T	1481/1733	1476/1684	0.6156
17	rs12451747	A	C	1520/1694	1475/1685	0.6184
11	rs2155248	G	T	192/3022	198/2962	0.6211
1	rs45530340	T	C	458/2756	464/2696	0.6212
11	rs2986407	T	C	598/2616	603/2557	0.6254
8	rs404337	G	A	1484/1730	1478/1682	0.6265
8	rs75404472	T	C	265/2949	250/2910	0.6294
17	rs111756476	T	A	370/2844	376/2784	0.6298
8	rs6997249	A	G	354/2860	360/2800	0.6307
1	rs75036690	A	G	101/3113	106/3054	0.6326
8	rs28655823	C	G	532/2682	537/2623	0.6345
2	rs10192411	G	A	240/2974	246/2914	0.6371
2	rs6726779	C	T	856/2358	858/2302	0.639
2	rs6430498	A	G	1141/2073	1139/2021	0.6483
10	rs72810954	A	G	61/3153	65/3095	0.6504
16	rs74469188	C	T	229/2985	216/2944	0.6535
8	rs487571	T	C	1448/1766	1406/1754	0.6539
6	rs12197631	G	T	152/3062	157/3003	0.6552
11	rs12801172	C	G	1488/1726	1480/1680	0.6676
15	rs7162033	G	C	595/2619	572/2588	0.6688
15	rs7183051	A	G	595/2619	572/2588	0.6688
5	rs2042253	C	T	1346/1868	1307/1853	0.6749
9	rs35196866	C	A	778/2436	751/2409	0.6773
1	rs701214	T	C	342/2872	346/2814	0.6876
16	rs57629257	T	C	1335/1879	1327/1833	0.7143
22	rs4822739	G	C	723/2491	723/2437	0.7146
4	rs12512664	G	A	110/3104	103/3057	0.7165
6	rs7769202	C	T	705/2509	705/2455	0.7178
17	rs6505162	A	C	582/2632	583/2577	0.7248
4	rs1077020	C	T	854/2360	852/2308	0.7256
5	rs62376935	T	C	921/2293	893/2267	0.727
22	rs4078443	T	C	735/2479	711/2449	0.7276
9	rs58605477	G	A	406/2808	408/2752	0.7356
4	rs77639117	T	A	146/3068	149/3011	0.7458
11	rs67042258	A	G	494/2720	495/2665	0.7465
20	rs6513497	G	T	338/2876	340/2820	0.7506
17	rs745666	C	G	1126/2088	1119/2041	0.7521
12	rs3817551	G	T	1357/1857	1322/1838	0.7567
16	rs12708966	A	G	82/3132	77/3083	0.7663
10	rs12780876	A	T	571/2643	570/2590	0.7749
17	rs73410309	C	G	241/2973	243/2917	0.7757
19	rs10423365	G	A	942/2272	936/2224	0.7875
2	rs243080	G	A	1073/2141	1065/2095	0.7919
2	rs2292832	C	T	880/2334	856/2304	0.7919
5	rs10061133	G	A	828/2386	805/2355	0.793
19	rs895819	C	T	835/2379	830/2330	0.7975
8	rs2114358	G	A	802/2412	780/2380	0.8018
5	rs12523324	G	A	1338/1876	1325/1835	0.8074
7	rs4909237	T	C	754/2460	749/2411	0.8182
12	rs11614913	C	T	1485/1729	1451/1709	0.8184
5	rs3112399	A	T	415/2799	402/2758	0.8215
10	rs11014002	T	C	672/2542	654/2506	0.8314
2	rs71428439	G	A	545/2669	542/2618	0.8351
15	rs1439619	G	T	929/2285	906/2254	0.8356
16	rs7500280	T	C	1249/1965	1220/1940	0.8362
1	rs72646786	T	C	506/2708	492/2668	0.8466
11	rs116971067	C	G	128/3086	123/3037	0.8526
1	rs2070960	T	C	614/2600	598/2562	0.8548
16	rs7499278	G	A	1245/1969	1217/1943	0.855
11	rs670637	G	A	62/3152	59/3101	0.856
11	rs634171	T	A	62/3152	59/3101	0.856
15	rs4414449	G	A	1115/2099	1103/2057	0.8578
15	rs4577031	A	T	1115/2099	1103/2057	0.8578
17	rs7210937	C	G	1391/1823	1361/1799	0.8642
19	rs10412196	C	T	261/2953	253/2907	0.8674
22	rs60308683	A	G	142/3072	137/3023	0.8712
17	rs7207008	A	T	924/2290	903/2257	0.8796
17	rs620301	G	A	1507/1707	1476/1684	0.8866
6	rs68035463	A	C	464/2750	460/2700	0.8915
6	rs67106263	A	G	464/2750	460/2700	0.8915
10	rs2043556	C	T	851/2363	832/2328	0.8943
5	rs257095	C	T	115/3099	115/3045	0.8944
10	rs4919510	C	G	1377/1837	1349/1811	0.9008
16	rs77250474	A	G	87/3127	84/3076	0.9047
12	rs12314280	C	T	340/2874	337/2823	0.9107
5	rs7709117	G	A	1561/1653	1539/1621	0.914
16	rs897984	T	C	228/2986	222/2938	0.9144
20	rs6513496	C	T	387/2827	378/2782	0.9226
15	rs2168518	A	G	498/2716	487/2673	0.9253
3	rs1514422	A	G	885/2329	867/2293	0.9293
3	rs35452137	C	A	151/3063	147/3013	0.9305
10	rs7896283	G	A	1415/1799	1388/1772	0.9347
1	rs521188	G	A	989/2225	975/2185	0.9426
19	rs10422347	T	C	116/3098	113/3047	0.9431
18	rs12456845	C	T	863/2351	851/2309	0.944
12	rs17022749	T	C	445/2769	436/2724	0.9554
16	rs74656628	A	T	129/3085	126/3034	0.9577
20	rs3746444	G	A	459/2755	450/2710	0.9631
11	rs550894	A	C	803/2411	788/2372	0.9653
6	rs9295535	C	T	992/2222	974/2186	0.9706
19	rs3745198	G	C	1515/1699	1491/1669	0.9707
2	rs56239160	A	G	1095/2119	1078/2082	0.9708
17	rs9913045	A	G	785/2429	773/2387	0.9718
14	rs2296320	A	G	153/3061	151/3009	0.9731
17	rs66507245	A	T	1567/1647	1542/1618	0.9732
3	rs9877402	G	A	150/3064	148/3012	0.9753
12	rs75258105	T	G	338/2876	333/2827	0.9775
7	rs7804972	A	G	466/2748	458/2702	0.995
9	rs13299349	A	G	348/2866	342/2818	0.995
* hg19 genome coordinate
