# Supplementary material for: MicroRNA Variants and HLA-miRNA Interactions are Novel Rheumatoid Arthritis Susceptibility Factors
Source: Front Genet. 2021 Oct 29;12:747274. doi: 10.3389/fgene.2021.747274 (PMC8585984; doi:10.3389/fgene.2021.747274)
Supplement: Supplementary file 2 [file Table3.XLSX]

## Sheet: Sheet1
Table S2. Epistasis analysis to identify SNP-SNP interaction in rheumatoid arthritis susceptibility
CHR1	SNP1	miRNA-1	CHR2	SNP2	miRNA-2	OR	STAT	P
1	rs1414273	MIR548AC	7	rs117344178	MIR595	0.313929	19.7655	8.76e-06
8	rs6997249	MIR3686	14	rs2273626	MIR4707	0.544402	19.759	8.79e-06
8	rs2114358	MIR1206	15	rs76468441	MIR548AP	0.274239	19.0585	1.27e-05
6	rs4285314	MIR3135B	16	rs16958290	MIR8058	1.53597	16.8634	4.02e-05
5	rs367805	MIR3936	10	rs641071	MIR4482	0.716913	16.0484	6.18e-05
7	rs7804972	MIR6839	17	rs620301	MIR548BC	1.47573	14.5928	0.000134
14	rs2296320	MIR4706	22	rs5997893	MIR3928	1.93891	14.5927	0.000134
5	rs2042253	MIR5197	6	rs9295535	MIR5689HG	1.34491	14.093	0.000174
10	rs7070684	MIR548AK	11	rs2155248	MIR1304	1.83627	13.3408	0.00026
1	rs73108496	MIR4428	11	rs67042258	MIR6128	0.558997	12.6479	0.000376
2	rs2241347	MIR3130	5	rs7709117	MIR4634	1.35183	12.3538	0.00044
1	rs877722	MIR4671	5	rs62376935	MIR585	0.700077	12.2212	0.000473
8	rs75404472	MIR3674	16	rs2925980	MIR7854	0.634786	12.1725	0.000485
9	rs3780662	MIR4672	10	rs11014002	MIR603	0.580794	12.0226	0.000526
7	rs4909237	MIR595	11	rs12801172	MIR10392	1.3425	11.831	0.000583
2	rs10175383	MIR3679	8	rs10505168	MIR2053	0.748224	11.7398	0.000612
9	rs56195815	MIR548AW	10	rs7911488	MIR1037	1.53774	11.6583	0.000639
3	rs6771809	MIR6826	14	rs12894467	MIR300	0.656563	11.5558	0.000676
17	rs58390814	MIR6780A	19	rs56061231	MIR6795	1.9326	11.4028	0.000734
3	rs75715827	MIR944	16	rs57629257	MIR1972	0.428358	11.1356	0.000847
6	rs68035463	MIR3144	14	rs12894467	MIR300	1.50915	10.9572	0.000933
miRNA genomic position was obtained from miRBase 22 which is based on hg38 and then was liftover to hg19 for the further analysis. Genomic position in the table is hg19 version.
