# Supplementary material for: MicroRNA Variants and HLA-miRNA Interactions are Novel Rheumatoid Arthritis Susceptibility Factors
Source: Front Genet. 2021 Oct 29;12:747274. doi: 10.3389/fgene.2021.747274 (PMC8585984; doi:10.3389/fgene.2021.747274)
Supplement: Supplementary file 3 [file Table4.XLSX]

## Sheet: Sheet1
Target Detail	Target Rank	Target Score	miRNA Name	Gene Symbol	Gene Description
Details	1	100	hsa-miR-548ac	CREBBP	CREB binding protein
Details	2	100	hsa-miR-548ac	UBE2D1	ubiquitin conjugating enzyme E2 D1
Details	3	100	hsa-miR-548ac	ZCCHC14	zinc finger CCHC-type containing 14
Details	4	100	hsa-miR-548ac	RSBN1	round spermatid basic protein 1
Details	5	99	hsa-miR-548ac	PSD3	pleckstrin and Sec7 domain containing 3
Details	6	99	hsa-miR-548ac	ARFGEF3	ARFGEF family member 3
Details	7	99	hsa-miR-548ac	MYC	MYC proto-oncogene, bHLH transcription factor
Details	8	99	hsa-miR-548ac	GFPT1	glutamine--fructose-6-phosphate transaminase 1
Details	9	99	hsa-miR-548ac	GRPEL2	GrpE like 2, mitochondrial
Details	10	99	hsa-miR-548ac	ONECUT2	one cut homeobox 2
Details	11	99	hsa-miR-548ac	MAPK8	mitogen-activated protein kinase 8
Details	12	99	hsa-miR-548ac	DCBLD2	discoidin, CUB and LCCL domain containing 2
Details	13	99	hsa-miR-548ac	IKZF2	IKAROS family zinc finger 2
Details	14	99	hsa-miR-548ac	ITPRIPL2	ITPRIP like 2
Details	15	99	hsa-miR-548ac	CCNYL1	cyclin Y like 1
Details	16	99	hsa-miR-548ac	SCYL2	SCY1 like pseudokinase 2
Details	17	99	hsa-miR-548ac	PDS5A	PDS5 cohesin associated factor A
Details	18	99	hsa-miR-548ac	INPP4A	inositol polyphosphate-4-phosphatase type I A
Details	19	99	hsa-miR-548ac	DYRK2	dual specificity tyrosine phosphorylation regulated kinase 2
Details	20	98	hsa-miR-548ac	TCF7L2	transcription factor 7 like 2
Please check more targets: https://github.com/Shicheng-Guo/miRNA-RA/blob/master/SupplementaryTable/Table-S4.xlsx
