# Supplementary material for: MicroRNA Variants and HLA-miRNA Interactions are Novel Rheumatoid Arthritis Susceptibility Factors
Source: Front Genet. 2021 Oct 29;12:747274. doi: 10.3389/fgene.2021.747274 (PMC8585984; doi:10.3389/fgene.2021.747274)
Supplement: Supplementary file 4 [file Table1.XLSX]

## Sheet: Sheet1
Table S1. Demographic information for the GHRA cohort
Characteristics	Case (n=1625)	Control (n=1598)
	n	n	P-value
Age
<60	786	721
≥60	816	871	P=0.035
Sex
Male	318	314
Female	1284	1278	P=0.963
BMI: Median(25%Q, 75%Q)	22.49(20.19,24.98)*	22.31(20.23,24.44)*	P=0.081
Underweight (BMI＜18.5)	153	150
Normal(18.5≤BMI＜24)	975	897
Overweight(24≤BMI＜28)	387	433
Obesity (BMI≥28)	84	112
Smoking
Yes	115	109
No	1439	1483	P=0.593
Drinking
Yes	39	55
No	1496	1537	P=0.164
* BMI: median, 25% and 75% quantile were applied to show the distribution difference and non-parametric mean test is applied for the distribution test.
Non-parametric mean test was applied in the differential distribution. Missing values for above characteristics were not showed in the table.
When we develop this cohort, we try to make case-control have matched age, gender, BMI, and other confounders to avoid non-necessary statistical bias to GWAS. Therefore we make "ordinal variable" to BMI to support us develop case-control easily. In our statistical test to identify significant SNPs, continuous variable is applied as confounder/covariates to identify indepdent association between S…
